# Supplementary material
Source: PubMed Central journal article supplement (PMC8284941)
Supplement: NIHMS1718525-supplement-Sup_Table2.pdf [file NIHMS1718525-supplement-Sup_Table2.pdf]

**Supplementary Table S2.** Selected second stage regression results\*, and risk score calculations.

|                                | <b>Beta</b> | <b>OR</b> | <b>Score</b> |
|--------------------------------|-------------|-----------|--------------|
| CHF                            | 0.63829     | 1.89324   | 6            |
| Cardiac Arrhythmia             | 0.193915    | 1.213993  | 2            |
| Cardiac Valve Disease          | 0.030813    | 1.031293  | 0            |
| Pulmonary Circulatory Disorder | 0.258893    | 1.295495  | 3            |
| Peripheral Vascular Disease    | 0.058591    | 1.060342  | 1            |
| Hypertension                   | -0.03937    | 0.961399  | -1           |
| Paralysis                      | 0.215795    | 1.240848  | 2            |
| Other Neurologic Disorder      | 0.06683     | 1.069114  | 1            |
| Chronic Pulmonary Disorder     | 0.595074    | 1.813166  | 6            |
| Hypothyroidism                 | -0.03576    | 0.964873  | 0            |
| Renal Failure                  | -0.00416    | 0.995848  | 0            |
| Liver Disease                  | 0.064001    | 1.066093  | 1            |
| Peptic Ulcer Disease           | 0.045418    | 1.046465  | 0            |
| AIDS                           | -0.06989    | 0.932498  | -1           |
| Lymphoma                       | 0.096089    | 1.100857  | 1            |
| Cancer: Metastatic             | 0.241279    | 1.272876  | 2            |
| Cancer: Solitary Tumor         | -0.00705    | 0.992975  | 0            |
| Rheumatoid Arthritis           | 0.05946     | 1.061263  | 1            |
| Coagulopathy                   | 0.069952    | 1.072457  | 0            |
| Obesity                        | -0.02915    | 0.971273  | 0            |
| Weight Loss                    | 0.025344    | 1.025668  | 0            |
| Fluid/Electrolyte Disorder     | 0.256275    | 1.292108  | 3            |
| Blood Loss Anemia              | -0.04399    | 0.956964  | 0            |
| Deficiency Anemia              | 0.090817    | 1.095069  | 1            |
| Alcohol Abuse                  | 0.112086    | 1.118609  | 1            |
| Drug Abuse                     | 0.285946    | 1.33102   | 3            |
| Psychosis                      | 0.063039    | 1.065068  | 1            |
| Depression                     | 0.12189     | 1.12963   | 1            |

\* Models also included patient demographics, VA facility, service connection, month and year. CHF – Congestive Heart Failure, AIDS – Acquired Immune Deficiency Syndrome.
