# Supplementary material
Source: PubMed Central journal article supplement (PMC8284941)
Supplement: NIHMS1718525-supplement-Sup_Table_1.pdf [file NIHMS1718525-supplement-Sup_Table_1.pdf]

Table S1. Comparison of Multivariable Regression and Instrumental Variable Analysis of the Effect of Home-Based Primary Care (HBPC) and Selected Comorbidities on the Odds of Hospitalization for an Ambulatory Care Sensitive Condition

| Factor                             | Standard Multivariable Regression (One Stage) | Instrumental Variable Analysis (Two Stage) |
|------------------------------------|-----------------------------------------------|--------------------------------------------|
|                                    | Odds Ratio (95% Confidence Interval)          |                                            |
| HBPC                               | 1.50 (1.45–1.55)                              | 0.35 (0.30–0.42)                           |
| Age (per year)                     | 1.01 (1.01–1.01)                              | 1.02 (1.02–1.02)                           |
| Congestive heart failure           | 1.88 (1.85–1.91)                              | 1.89 (1.86–1.92)                           |
| Cardiac arrhythmia                 | 1.22 (1.20–1.24)                              | 1.21 (1.19–1.23)                           |
| Cardiac valve disease              | 1.04 (1.02–1.06)                              | 1.03 (1.01–1.05)                           |
| Pulmonary circulatory disorder     | 1.29 (1.25–1.33)                              | 1.30 (1.26–1.33)                           |
| Hypertension                       | 0.98 (0.96–1.00)                              | 0.96 (0.94–0.98)                           |
| Paralysis                          | 1.14 (1.10–1.18)                              | 1.24 (1.19–1.29)                           |
| Other neurological disorder        | 1.05 (1.02–1.07)                              | 1.07 (1.03–1.10)                           |
| Chronic pulmonary disorder         | 1.80 (1.77–1.82)                              | 1.81 (1.79–1.84)                           |
| Hypothyroidism                     | 0.96 (0.95–0.98)                              | 0.96 (0.94–0.98)                           |
| Renal failure                      | 1.02 (1.00–1.04)                              | 1.00 (0.98–1.02)                           |
| Liver disease                      | 1.09 (1.05–1.12)                              | 1.07 (1.04–1.17)                           |
| Peptic ulcer disease               | 1.03 (0.99–1.06)                              | 1.04 (1.01–1.08)                           |
| Acquired immunodeficiency syndrome | 0.98 (0.86–1.10)                              | 0.93 (0.82–1.06)                           |
| Lymphoma                           | 1.09 (1.03–1.16)                              | 1.10 (1.04–1.17)                           |
| Cancer: metastatic                 | 1.26 (1.19–1.33)                              | 1.27 (1.20–1.34)                           |
| Cancer: solitary tumor             | 1.00 (0.98–1.02)                              | 0.99 (0.98–1.01)                           |
| Rheumatoid arthritis               | 1.06 (1.02–1.07)                              | 1.06 (1.03–1.10)                           |
| Coagulopathy                       | 1.05 (1.02–1.07)                              | 1.07 (1.04–1.10)                           |
| Obesity                            | 0.97 (0.93–1.01)                              | 0.97 (0.96–0.99)                           |
| Weight loss                        | 1.00 (0.98–1.04)                              | 1.03 (0.99–1.06)                           |
| Fluid or electrolyte disorder      | 1.28 (1.26–1.30)                              | 1.29 (1.27–1.31)                           |
| Blood loss anemia                  | 0.97 (0.93–1.00)                              | 0.96 (0.92–1.00)                           |
| Iron-deficiency anemia             | 1.10 (1.08–1.11)                              | 1.10 (1.08–1.11)                           |
| Alcohol abuse                      | 1.12 (1.08–1.15)                              | 1.12 (1.08–1.15)                           |
| Drug abuse                         | 1.38 (1.33–1.43)                              | 1.33 (1.28–1.38)                           |
| Psychosis                          | 1.04 (1.02–1.05)                              | 1.07 (1.05–1.08)                           |
| Depression                         | 1.08 (1.07–1.10)                              | 1.12 (1.11–1.15)                           |

Model also included participant demographic characteristics, month, year, and Veterans Affairs Medical Center

Table S2. Selected Second Stage Regression Results and Risk Score Calculations

|                                    | Beta     | Odds Ratio | Score |
|------------------------------------|----------|------------|-------|
| Congestive heart failure           | 0.63829  | 1.89324    | 6     |
| Cardiac arrhythmia                 | 0.19391  | 1.21399    | 2     |
| Cardiac valve disease              | 0.03081  | 1.03129    | 0     |
| Pulmonary circulatory disorder     | 0.25889  | 1.29549    | 3     |
| Peripheral vascular disease        | 0.05859  | 1.06034    | 1     |
| Hypertension                       | -0.03937 | 0.96140    | -1    |
| Paralysis                          | 0.21579  | 1.24085    | 2     |
| Other neurological disorder        | 0.06683  | 1.06911    | 1     |
| Chronic pulmonary disorder         | 0.59507  | 1.81317    | 6     |
| Hypothyroidism                     | -0.03576 | 0.96487    | 0     |
| Renal failure                      | -0.00416 | 0.99585    | 0     |
| Liver disease                      | 0.06400  | 1.06609    | 1     |
| Peptic ulcer disease               | 0.04542  | 1.04646    | 0     |
| Acquired immunodeficiency syndrome | -0.06989 | 0.93250    | -1    |
| Lymphoma                           | 0.09609  | 1.10086    | 1     |
| Cancer: metastatic                 | 0.24128  | 1.27288    | 2     |
| Cancer: solitary tumor             | -0.00705 | 0.99297    | 0     |
| Rheumatoid Arthritis               | 0.05946  | 1.06126    | 1     |
| Coagulopathy                       | 0.06995  | 1.07246    | 0     |
| Obesity                            | -0.02915 | 0.97127    | 0     |
| Weight loss                        | 0.02534  | 1.02567    | 0     |
| Fluid or electrolyte disorder      | 0.25627  | 1.29211    | 3     |
| Blood loss anemia                  | -0.04399 | 0.95696    | 0     |
| Iron-deficiency anemia             | 0.09082  | 1.09507    | 1     |
| Alcohol abuse                      | 0.11209  | 1.11861    | 1     |
| Drug abuse                         | 0.28595  | 1.33102    | 3     |
| Psychosis                          | 0.06304  | 1.06507    | 1     |
| Depression                         | 0.12189  | 1.12963    | 1     |

Models also included participant demographic characteristics, Veterans Affairs facility, service connection, month, and year.

**Commented [AR1]:** Is this different from VAMC? If not, please use one or the other consistently here and in the other tables
